# Supplementary material for: Low Muscle and High Fat Percentages Are Associated with Low Natural Killer Cell Activity: A Cross-Sectional Study
Source: MDPI journal article supplement (doi:10.3390/ijms241512505), 2023-08-06
Supplement: s1 [file s1]

**Table S1.** Differences in body composition and clinical variables according to the gender.

|                        | <b>Men</b>     | <b>Women</b>    | <b><i>p</i></b> |
|------------------------|----------------|-----------------|-----------------|
| Number, n              | 3,682          | 4,376           |                 |
| Age, years             | 49.2 ± 11.5    | 47.1 ± 11.7     | <0.001          |
| Height, cm             | 173.8 ± 5.9    | 161.6 ± 5.7     | <0.001          |
| Weight, kg             | 76.1 ± 11.2    | 56.8 ± 8.8      | <0.001          |
| BMI, kg/m <sup>2</sup> | 25.2 ± 3.3     | 21.8 ± 3.4      | <0.001          |
| Muscle mass, kg        | 54.6 ± 6.4     | 37.2 ± 4.1      | <0.001          |
| Muscle percent, %      | 72.2 ± 5.5     | 66.2 ± 6.4      | <0.001          |
| Fat mass, kg           | 18.4 ± 6.7     | 17.3 ± 6.4      | <0.001          |
| Fat percent, %         | 23.7 ± 5.8     | 29.8 ± 6.7      | <0.001          |
| WBC, cells/μL          | 5.66 ± 1.55    | 5.21 ± 1.45     | <0.001          |
| CRP, mg/dL             | 0.18 ± 0.40    | 0.16 ± 0.47     | 0.139           |
| Glucose, mg/dL         | 94.9 ± 20.4    | 85.4 ± 14.1     | <0.001          |
| Insulin, μIU/mL        | 7.5 ± 5.9      | 5.4 ± 4.0       | <0.001          |
| HOMA-IR                | 1.84 ± 1.88    | 1.21 ± 1.06     | <0.001          |
| NKA, pg/mL             | 1124.5 ± 990.6 | 1153.5 ± 1010.3 | 0.195           |
| Hypertension, n (%)    | 797 (21.6)     | 371 (8.5)       | <0.001          |
| Diabetes, n (%)        | 319 (8.7)      | 117 (2.7)       | <0.001          |
| Dyslipidemia, n (%)    | 650 (17.7)     | 475 (10.9)      | <0.001          |

Data are expressed as mean ± SD. *p*-values were calculated using the t-test and chi-squared test.

Abbreviations: BMI, body mass index; CRP, C-reactive protein; HOMA-IR, homeostatic assessment model of insulin resistance; NKA, natural killer cell activity; WBC, white blood cell.
